# Supplementary material
Source: Springer Nature journal article supplement (https://www.springermedizin.de/resource/supplementary/12865_2011_425_MOESM5_ESM.pdf/9428056)

A) Non-stimulated

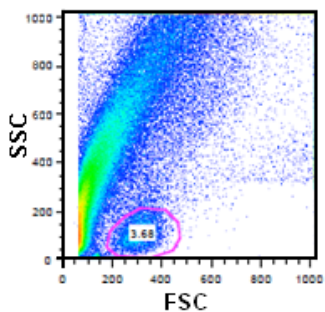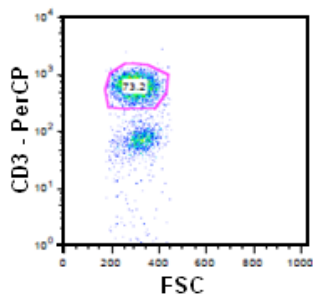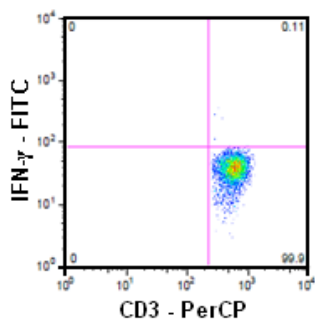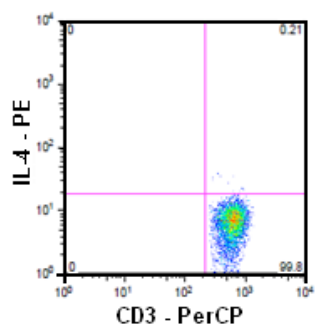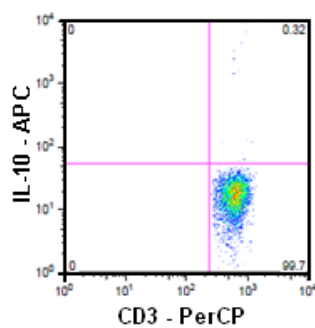

B) Stimulated

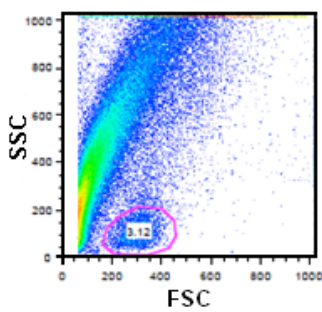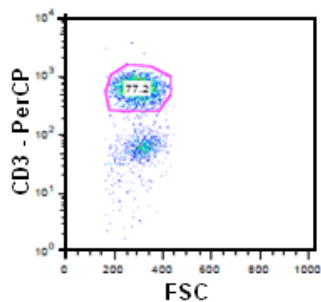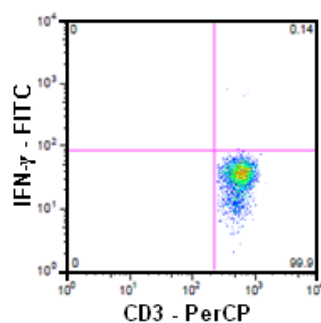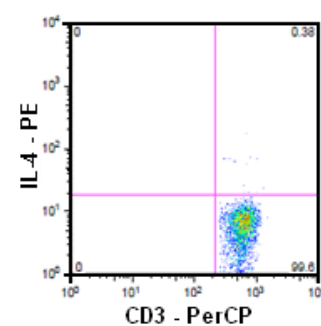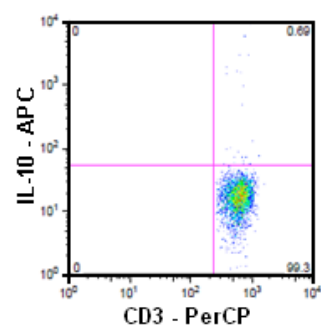

Supplement: MOESM5 [file 9428056]
